# Supplementary material
Source: HighWire-hosted journal article supplement (https://bmjopen.bmj.com/content/7/2/e013572)
Supplement: inline-supplementary-material-1 [file inline-supplementary-material-1.pdf]

## Online-Only Supplements

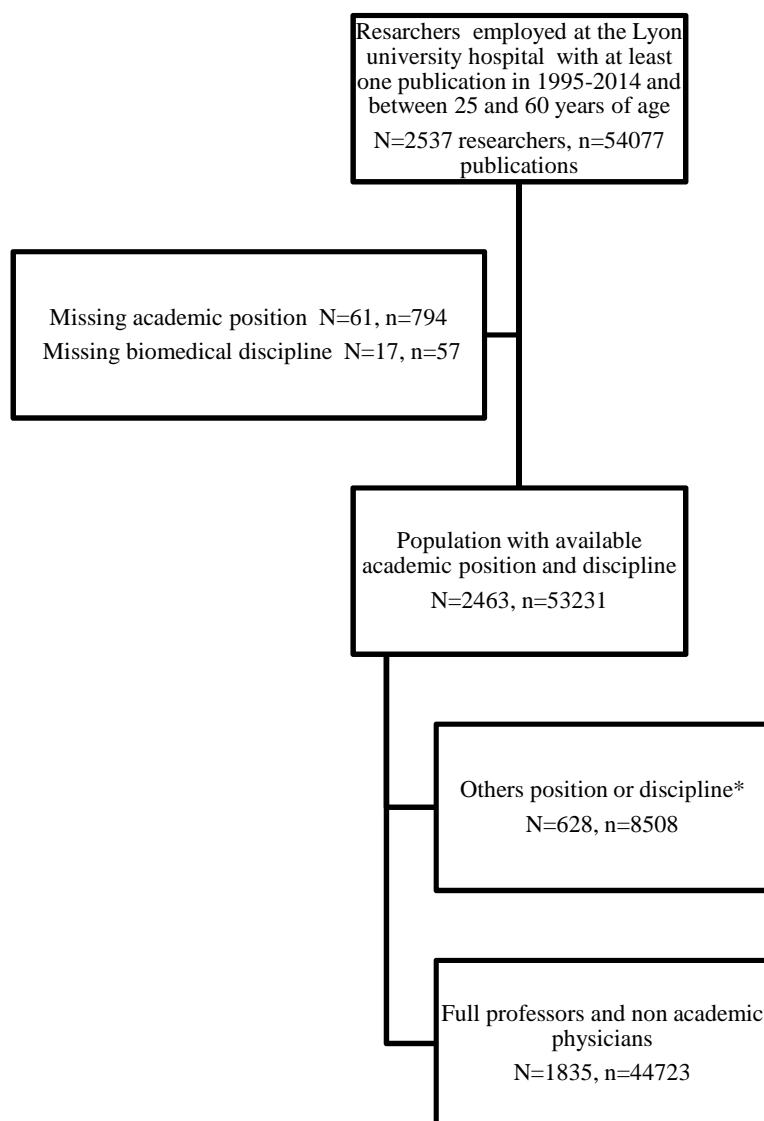

eFigure 1 – Flow chart

\* 527 others position: 37 medical students, residents and fellows, 62 research staff, 272 assistant professors and 156 associate professors. 152 others discipline: 88 pharmacists, 43 dentists, and 21 psychiatrists. The categories for positions and disciplines were not mutually exclusives.
