# Supplementary material
Source: HighWire-hosted journal article supplement (https://bmjopen.bmj.com/content/7/2/e013572)
Supplement: inline-supplementary-material-2 [file inline-supplementary-material-2.pdf]

## Online-Only Supplements

eTable 1 - P-values in multivariable models for annual publications

|                                                       | Association with number of annual publications |                      |                                |
|-------------------------------------------------------|------------------------------------------------|----------------------|--------------------------------|
|                                                       | All                                            | As first/last author | In high impact factor journals |
| <b>Age</b>                                            |                                                |                      |                                |
| <i>Linear effect</i>                                  | <.0001                                         | <.0001               | <.0001                         |
| <i>Quadratic effect</i>                               | <.0001                                         | <.0001               | <.0001                         |
| <i>Spline on quadratic effect after 30 years</i>      | 0.0609                                         | <.0001               | 0.0334                         |
| <i>Spline on quadratic effect after 35 years</i>      | <.0001                                         | <.0001               | <.0001                         |
| <i>Spline on quadratic effect after 50 years</i>      | 0.0083                                         | 0.0513               | 0.0503                         |
| <b>Birth cohort</b>                                   | <.0001                                         | 0.1066               | <.0001                         |
| <b>Academic position</b>                              |                                                |                      |                                |
| <i>Overall effect on full professor</i>               | 0.0096                                         | 0.0218               | 0.0163                         |
| <i>Linear effect of age on full professor</i>         | <.0001                                         | <.0001               | <.0001                         |
| <i>Quadratic effect of age on full professor</i>      | <.0001                                         | <.0001               | <.0001                         |
| <b>Discipline</b>                                     |                                                |                      |                                |
| <i>Overall effect on each discipline</i>              | 0.0335                                         | 0.0573               | <.0001                         |
| <i>Linear effect of age on each discipline</i>        | 0.0115                                         | 0.0491               | 0.0088                         |
| <b>Academic position and discipline</b>               |                                                |                      |                                |
| <i>Effect of academic position on each discipline</i> | 0.0099                                         | 0.0012               | 0.0268                         |

*Interpretation: Significance level of determinants included in the three multivariate models (for the three outcomes), for example, birth cohort is significantly associated with the total number of annual publication ( $p < 0.0001$ ) but not with the number of annual publications as first/last author ( $p = 0.1066$ ).*
